# Supplementary material for: Etv2 regulates enhancer chromatin status to initiate Shh expression in the limb bud
Source: PubMed Central journal article supplement (PMC9304341; doi:10.1038/s41467-022-31848-6), 2022-07-21
Supplement: 41467_2022_31848_MOESM1_ESM.pdf [file 41467_2022_31848_MOESM1_ESM.pdf]

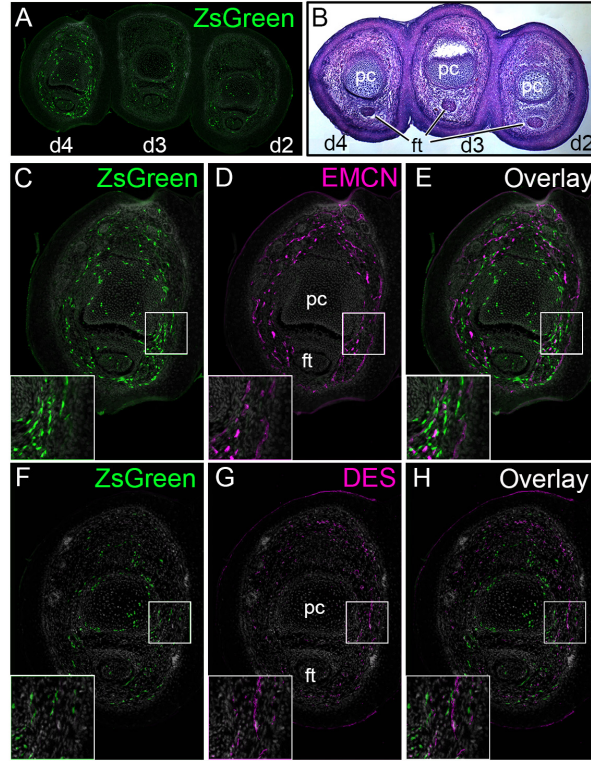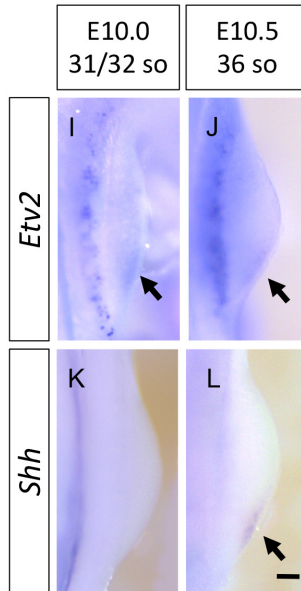

**Figure S1 (related to Figure 1).** The *Etv2* lineage contributes mainly to two posterior digits and does not co-label with endomucin or desmin. The E18.5 limb shown in Figure 1B and 1C was sectioned and analyzed. **(A, C-H)** Immunohistochemistry with GFP antibody, which detects ZsGreen (A, C, F), endomucin antibody (EMCN) (D), and desmin antibody (DES) (G). E and H are overlays of C&D and F&G, respectively. Boxed areas in each panel are enlarged in the bottom left corners. DAPI stain is shown in gray. **(B)** Hematoxylin-Eosin stain. d2-d4, digits 2-4; pc, primordial cartilage; ft flexor tendon. **(I-L)** *In situ* hybridization of *Etv2* (I, J) and *Shh* (K, L) at the indicated embryonic stages. Somite numbers of each embryo are also indicated. Arrows in I, J and arrow in L indicate *Etv2* and *Shh* expression in hindlimb buds, respectively. At least three embryos were analyzed at each stage for each marker with essentially the same results.

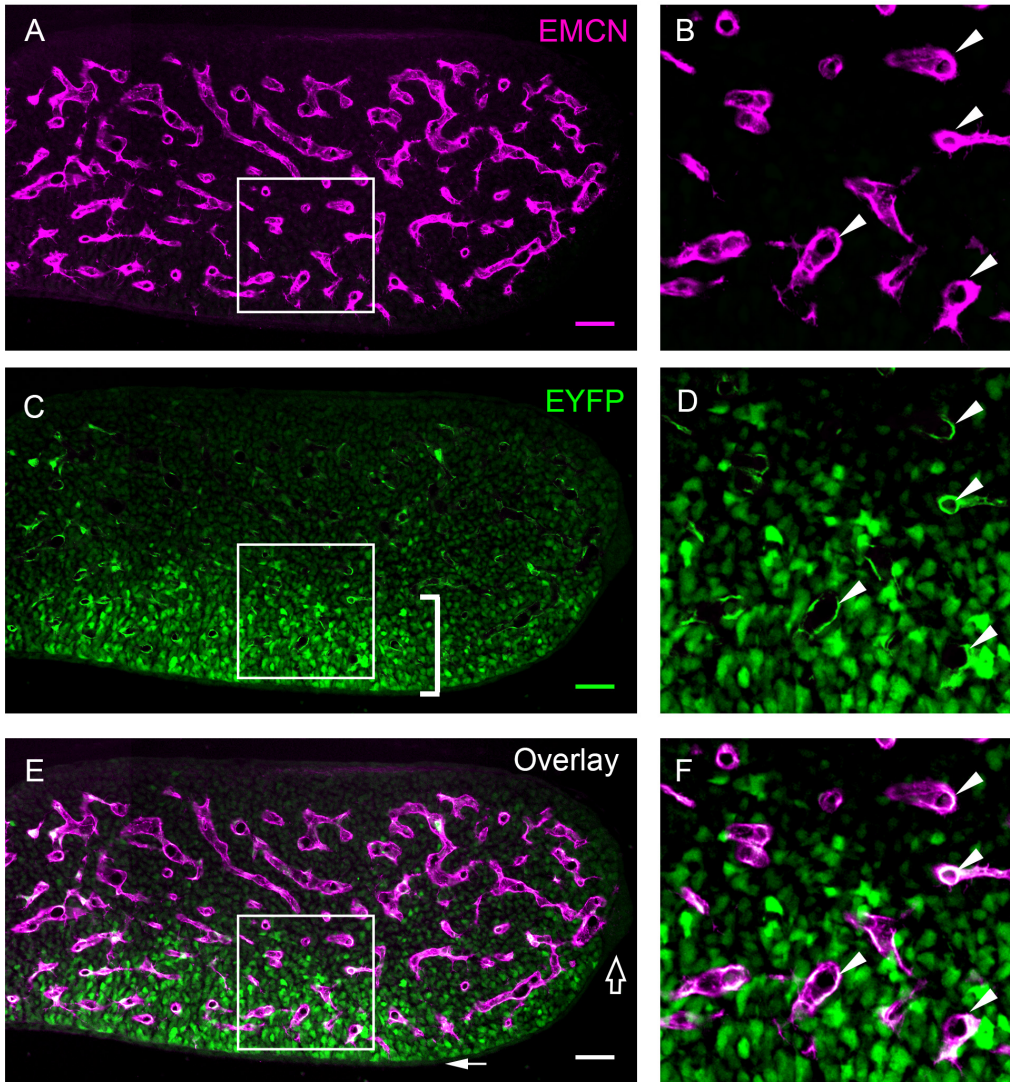

**Figure S2 (related to Figure1).** ETV2 is expressed in two distinct populations of the developing limb. E10.5 forelimb from an *Etv2-EYFP* transgenic embryo was sectioned transversely (perpendicular to the rostral-caudal body axis) and analyzed by immunohistochemistry for ENDOMUCIN (EMCN) (A, B) and EYFP (C, D) expression. E and F are overlays of ENDOMUCIN and EYFP staining. Boxed areas in A, C, and E are enlarged in B, D, and F. Note that EYFP was expressed in two distinct populations: the endothelial lineage that expresses ENDOMUCIN (B, D, F, white arrowheads); and a non-endothelial population that was localized to ventro-posterior region of the limb bud (bracket in C). Note that EYFP was not expressed in the ectoderm (white arrow in E), including the apical ectodermal ridge (open arrow in E). Each analysis was repeated with three embryos with essentially the same results. Scale bar is 100  $\mu\text{m}$ .

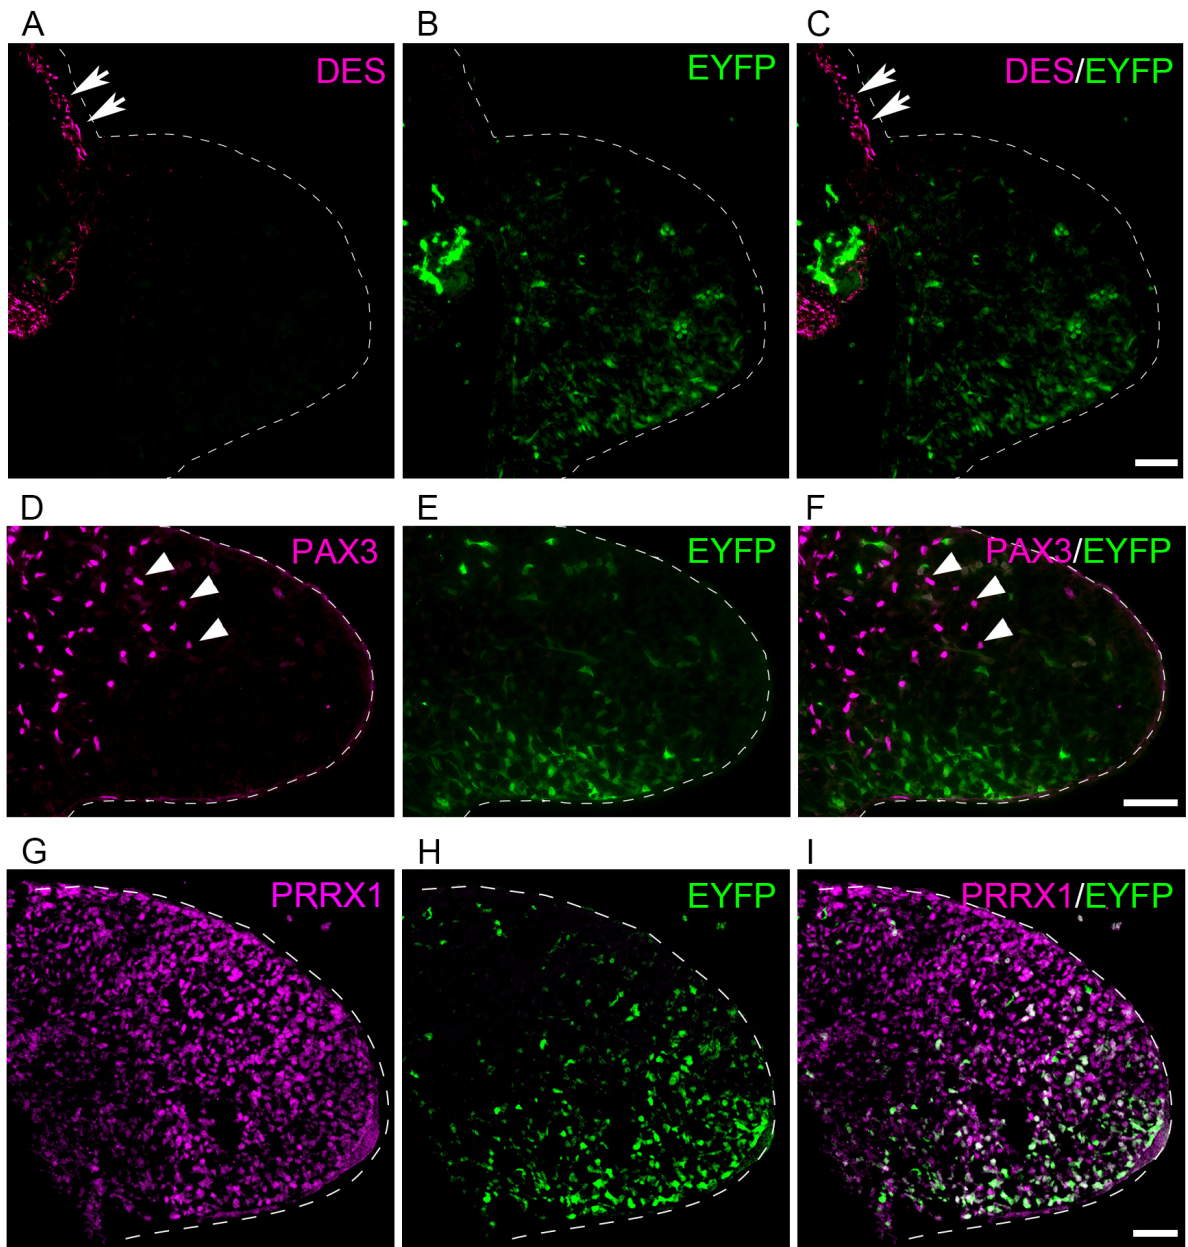

**Figure S3 (related to Figure 1).** ETV2 is expressed in the limb mesenchyme. (A-I) Cross sections of the E10.5 hindlimb buds of *Etv2-EYFP* transgenic embryos were made and analyzed by immunohistochemistry. Antibodies directed to DESMIN (A, C), PAX3 (D, F), PRRX1 (G, I), and GFP, which detects EYFP (B, C, E, F, H, I) were used. Broken lines indicate the outlines of the tissues. Note that EYFP did not colocalize with DESMIN (A, C, arrows) or PAX3 (D, F, arrowheads), but colocalized with PRRX1 (G, I). Scale bars are 100  $\mu$ m. Each analysis was repeated with three embryos with essentially the same results.



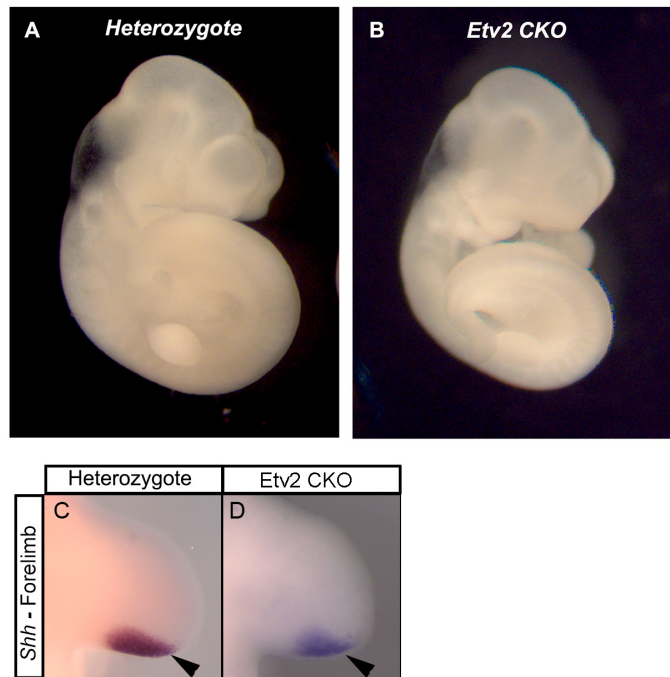

**Figure S4 (related to Figure 2).** Morphology of the control and *HoxB6-Etv2CKO* embryos. **(A, B)** Whole-mount images of control (A) and *Etv2CKO* embryos (B) at E10.5 are shown. **(C, D)** Whole-mount in situ hybridization of *Shh* at E10.5 (36-37 somites). Forelimb buds of the embryos in Figure 2A (control) and 2B (*Etv2CKO*) are shown. Note, in contrast to hindlimb buds that completely lacked *Shh* expression (Fig. 2B), *Shh* was present in forelimb buds. Five embryos were analyzed with essentially the same results.

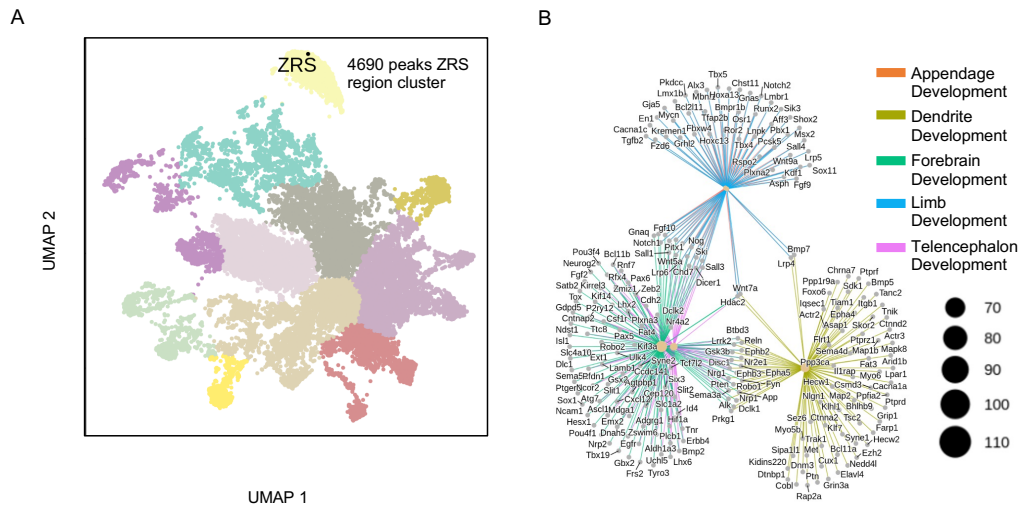

**Figure S5 (related to Figure 3). ZRS belonged to a cluster with 4,690 ATAC-seq peaks, which nearby genes were significantly associated with limb development. (A) UMAP of among 110,133 200-bp ATAC-seq peaks across all samples. (B) The pathway analysis of the cluster of 4,690 ATAC-seq peaks, including ZRS.**



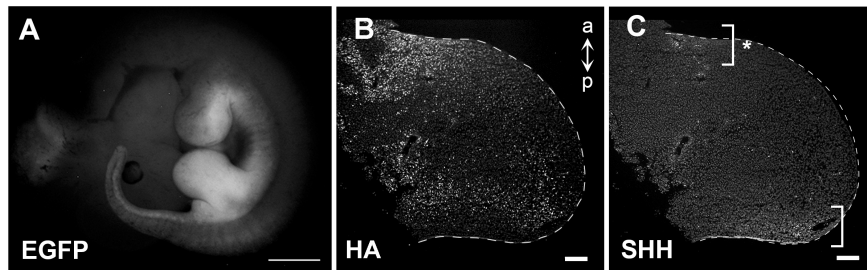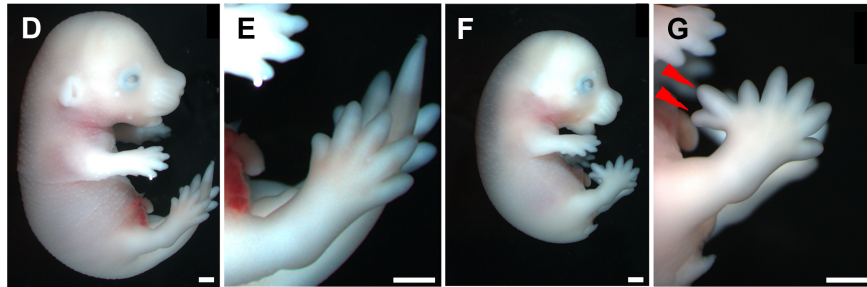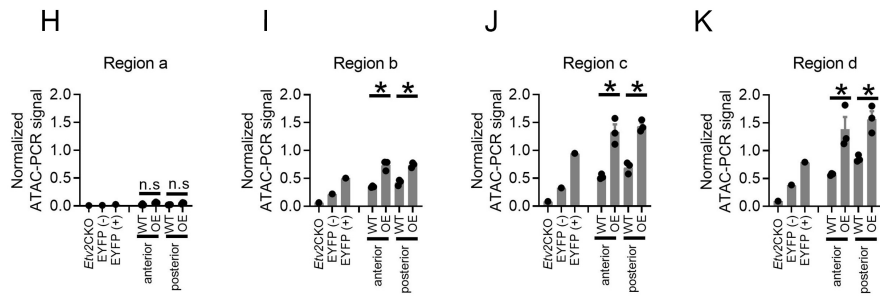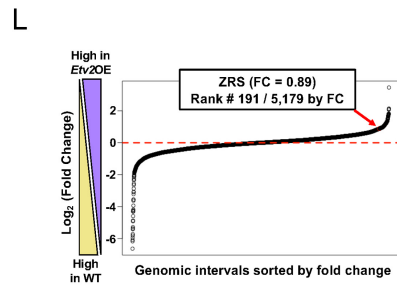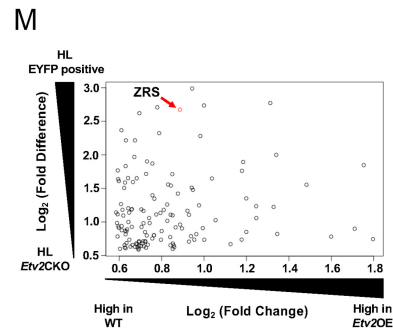

**Figure S6 (related to Figure 5).** Overexpression of *Etv2* in the hindlimb bud alters chromatin accessibility and results in polydactyly. **(A-C)** *HoxB6-Cre<sup>Tg/+</sup>; iHA-Etv2<sup>Tg/+</sup>; ROSA26-rtTA-IRES-EGFP<sup>Tg/+</sup>* embryo was pulsed with Dox at E9.5 and E10.5 and analyzed at E11.5. Whole-mount analysis of EGFP epifluorescence at E11.5 confirms Cre recombination in the hindlimb (A). A frontal section (sectioned perpendicular to the dorso-ventral axis) of the hindlimb stained with antibody to HA epitope (B) and SHH protein (C). Broken lines indicate the outline of the section. Bars indicate 1mm in A and 100 $\mu$ m in B and C, respectively. The anterior (a)-posterior (p) direction is indicated by an arrow in B. Note the ectopic expression of SHH in the anterior domain (bracket with asterisk in C), in addition to the normal expression domain (bracket in C). **(D-G)** Whole-mount images of embryos shown in Figure 5D and 5H. **(H-K)** ATAC-PCR analysis of the limb bud samples used for ATAC-seq. Chromatin accessibility of regions a (H), b (I), c (J), and d (K) were assessed by qPCR relative to the accessibility of the GAPDH promoter. Samples analyzed are: from left to right, *Etv2*CKO hindlimb, hindlimb *Etv2*-EYFP negative, hindlimb *Etv2*-EYFP positive (samples used in Figure 3D), wild type anterior half of the hindlimb, *Etv2*OE anterior half of the hindlimb, wild type posterior half of the hindlimb, and *Etv2*OE posterior half of the hindlimb (samples used in Figure 5I). *Etv2*CKO hindlimb, hindlimb *Etv2*-EYFP negative, hindlimb *Etv2*-EYFP positive bars are qPCR of an ATAC-seq library generated with pooled limb buds from 5, 20, and 20 embryos, respectively. Wild type and *Etv2*OE bars each represent an average of the qPCR data obtained from three ATAC-seq libraries generated from three independent embryos. Data in the graphs are presented as mean values +/- SEM. Statistical test: one-way ANOVA with Holm-Sidak's multiple comparisons test. Note that the chromatin of Region a is closed in all samples (H), but Regions b-d are more accessible, and the accessibility was increased by overexpression of *Etv2* (I-K). (L) Genomic intervals ranked by the degree of accessibility change according to overexpression of *Etv2*. (M) Plot of accessibility difference between (hindlimb EYFP positive/*Etv2*CKO) versus (*Etv2*OE anterior/ wildtype anterior).

**Supplementary Table 1. Antibodies**

| ANTIBODIES                                                           | SOURCE           | IDENTIFIER                             |
|----------------------------------------------------------------------|------------------|----------------------------------------|
| Anti Active Caspase-3 clone C92-605 (1:200 for immunohistochemistry) | BD Biosciences   | BD Cat#559565, RRID:AB_397274          |
| Anti Desmin (1:250 for immunohistochemistry)                         | Novus            | Novus Cat# NB120-15200, RRID:AB_789575 |
| Anti E47 (0.2µg/reaction for EMSA)                                   | Santa Cruz       | Cat# sc-763X, RRID:AB_631405           |
| Anti Endomucin (1:400 for immunohistochemistry)                      | Abcam            | Cat# ab106100, RRID:AB_10859306        |
| Anti Etv2 (0.2µg/reaction for EMSA, 2µg/reaction for ChIP)           | Sana Cruz        | Cat# sc-164278, RRID:AB_2100842        |
| Anti GFP (1:400 for immunohistochemistry)                            | Abcam            | Cat# ab13970, RRID:AB_300798           |
| Anti HA (1:200 for immunohistochemistry)                             | Roche            | Cat# 11867423001, RRID:AB_390918       |
| Anti Hand2 (0.2µg/reaction for EMSA)                                 | Santa Cruz       | Cat# sc-9411, RRID:AB_2115993          |
| Anti HoxD13 (0.2µg/reaction for EMSA)                                | Santa Cruz       | sc-46364X                              |
| Anti Pax3 (1:200 for immunohistochemistry)                           | DSHB             | Cat# PAX3, RRID:AB_528426              |
| Anti phospho histone H3 (1:200 for immunohistochemistry)             | Millipore        | Cat# 05-806, RRID:AB_310016            |
| Anti Prrx1 (1:100 for immunohistochemistry)                          | Abcam            | Ab211292                               |
| Anti Smooth Muscle Actin (1:800 for immunohistochemistry)            | Thermo           | MS-1B-90                               |
| Anti-SHH (1:200 for immunohistochemistry)                            | Santa Cruz       | Cat# sc-9024, RRID:AB_2239216          |
| Control mouse IgG (0.2µg/reaction for EMSA)                          | Jackson          | Cat# 015-000-003, RRID:AB_2337188      |
| Control goat IgG (0.2µg/reaction for EMSA, 2µg/reaction for ChIP)    | Jackson          | Cat# 005-000-003, RRID:AB_2336985      |
| Control Rabbit IgG (0.2µg/reaction for EMSA)                         | Jackson          | Cat# 011-000-003, RRID:AB_2337118      |
| Tie2-PE (0.2µg per million cells for FACS)                           | e-bioscience     | Cat# 12-5987-83, RRID:AB_466101        |
| CD31-PE (0.2µg per million cells for FACS)                           | Becton Dickinson | Cat# 553373, RRID:AB_394819            |
| CD45-PE (0.2µg per million cells for FACS)                           | e-bioscience     | Cat# 12-0451-82, RRID:AB_465668        |
| CD16/CD32 (0.5µg per million cells for FACS)                         | Becton Dickinson | Cat# 553141, RRID:AB_394656            |

## Supplementary Table 2. Key Resources

| Chemicals, Peptides, and Recombinant Proteins                                                  |                                 |                       |
|------------------------------------------------------------------------------------------------|---------------------------------|-----------------------|
| 4-hydroxy tamoxifen                                                                            | Sigma-Aldrich                   | H7904; CAS:68047-06-3 |
| doxycycline                                                                                    | Sigma-Aldrich                   | D3447; CAS:10592-13-9 |
| Critical Commercial Assays                                                                     |                                 |                       |
| Qiagen Micro RNeasy kit                                                                        | Qiagen                          | 74004                 |
| In situ cell death detection kit, TMR red                                                      | Roche                           | 12156792910           |
| Nextera Tn5 transposase                                                                        | Illumina                        | FC-121-1030           |
| Qiagen MinElutePCR purification kit                                                            | Qiagen                          | 28004                 |
| SsoAdvanced SYBR Green Supermix                                                                | Bio-Rad                         | 172-5260              |
| ChIP assay kit                                                                                 | Millipore                       | 17-295                |
| Dynabeads Protein G                                                                            | Invitrogen                      | 10003D                |
| Dynabeads Protein A                                                                            | Invitrogen                      | 10001D                |
| Click-iT™ Alexa Fluor™488 Imaging Kit                                                          | ThermoFisher                    | C10337                |
| Deposited Data                                                                                 |                                 |                       |
| GEO accession numbers for ATAC-seq data                                                        | GSE192865                       |                       |
| Token for Reviewer access to the data                                                          | mxwtmiyelporjon                 |                       |
| Experimental Models: Cell Lines                                                                |                                 |                       |
| Mouse: NIH3T3 cells                                                                            | ATCC                            | CRL-1658              |
| Experimental Models: Organisms/Strains                                                         |                                 |                       |
| Etv2 knockout                                                                                  | Ferdous et al., 2009            | N/A                   |
| Etv2 <sup>flox/flox</sup>                                                                      | Shi et al., 2015                | N/A                   |
| Etv2(ER71)-EYFP                                                                                | Rasmussen et al., 2011          | N/A                   |
| Etv2(ER71)-Cre                                                                                 | Rasmussen et al., 2011          | N/A                   |
| Etv2(ER71)-CreERT2                                                                             | This paper                      | N/A                   |
| ROSA26-LacZ                                                                                    | Freidrich 1 et al., 991         | RRID:IMSR_JAX:003309  |
| ROSA26-ZsGreen1                                                                                | Madisen et al., 2010            | RRID:IMSR_JAX:007906  |
| ROSA26-rtTA-ires-EGFP                                                                          | Belteki et al., 2005            | RRID:IMSR_JAX:005670  |
| iHA-Etv2                                                                                       | This paper/ Behrens et al. 2014 | N/A                   |
| HoxB6-Cre                                                                                      | Lowe et al., 2000               | RRID:IMSR_JAX:017981  |
| Shh-EGFP-Cre                                                                                   | Harfe et al., 2004              | RRID:IMSR_JAX:005622  |
| Oligonucleotides                                                                               |                                 |                       |
| See Supplementary Table 3 for oligonucleotides used for ChIP assay, EMSA, and DNA construction | Supplementary Table 2           | N/A                   |

|                                                                                                                                                                                                                                                                                                                                                                                                                                                                                                                                                                                                               |                                                                   |               |
|---------------------------------------------------------------------------------------------------------------------------------------------------------------------------------------------------------------------------------------------------------------------------------------------------------------------------------------------------------------------------------------------------------------------------------------------------------------------------------------------------------------------------------------------------------------------------------------------------------------|-------------------------------------------------------------------|---------------|
|                                                                                                                                                                                                                                                                                                                                                                                                                                                                                                                                                                                                               |                                                                   |               |
| <b>Recombinant DNA</b>                                                                                                                                                                                                                                                                                                                                                                                                                                                                                                                                                                                        |                                                                   |               |
| ZRS reporter plasmid: pGL4-TATA-ZRS-Luciferase                                                                                                                                                                                                                                                                                                                                                                                                                                                                                                                                                                | Galli et al., 2010                                                | N/A           |
| Internal control plasmid for luciferase assay: pRL-CMV                                                                                                                                                                                                                                                                                                                                                                                                                                                                                                                                                        | Promega                                                           | E2231         |
| Control plasmid for transfection: pCDNA3-HA                                                                                                                                                                                                                                                                                                                                                                                                                                                                                                                                                                   | Ferdous et al., 2009                                              | N/A           |
| Flt1 reporter plasmid: pGL3-Flt1-Luciferase                                                                                                                                                                                                                                                                                                                                                                                                                                                                                                                                                                   | Koyano-Nakagawa et al., 2015                                      | N/A           |
| HoxD13 plasmid: pCDNA3.1(+) 3-Flag hu HoxD13 (H4-1)                                                                                                                                                                                                                                                                                                                                                                                                                                                                                                                                                           | This paper                                                        | N/A           |
| Hand2 plasmid: TnT (M60-3)                                                                                                                                                                                                                                                                                                                                                                                                                                                                                                                                                                                    | This paper                                                        | N/A           |
| Ets1 plasmids: pCDNA3 C-term 1X flag Ets1 (M2-11) for protein synthesis, pCMV-SPORT6-Ets1 for transfection                                                                                                                                                                                                                                                                                                                                                                                                                                                                                                    | This paper                                                        | N/A           |
| Ets2 plasmids: pCDNA3 C-term 1X flag (M2-2) for protein assay, pCMV-SPORT6-Ets2 for transfection                                                                                                                                                                                                                                                                                                                                                                                                                                                                                                              | This paper                                                        | N/A           |
| Etv4 plasmid: pQCXih-Etv4                                                                                                                                                                                                                                                                                                                                                                                                                                                                                                                                                                                     | Hollenhorst et al., 2011                                          | N/A           |
| Etv5 plasmid: flag tagged Etv5                                                                                                                                                                                                                                                                                                                                                                                                                                                                                                                                                                                | Zhang et al., 2010                                                | N/A           |
| Etv2 plasmids: pCDNA HA-ER71XS for protein assay, pCSFmt107-ER71 for transfection                                                                                                                                                                                                                                                                                                                                                                                                                                                                                                                             | This paper/Koyano-Nakagawa et al, 2012                            | N/A           |
| Shh plasmid for in situ hybridization                                                                                                                                                                                                                                                                                                                                                                                                                                                                                                                                                                         | Akiyama et al., 2015                                              | N/A           |
| Ptch1 plasmid for in situ hybridization                                                                                                                                                                                                                                                                                                                                                                                                                                                                                                                                                                       | Hayashi et al., 2016                                              | N/A           |
| Gli1 plasmid for in situ hybridization                                                                                                                                                                                                                                                                                                                                                                                                                                                                                                                                                                        | Akiyama et al., 2015                                              | N/A           |
| Hand2 plasmid for in situ hybridization                                                                                                                                                                                                                                                                                                                                                                                                                                                                                                                                                                       | Hayashi et al., 2016                                              | N/A           |
| Hoxd13 plasmid for in situ hybridization                                                                                                                                                                                                                                                                                                                                                                                                                                                                                                                                                                      | Hayashi et al., 2016                                              | N/A           |
| Dusp6 plasmid for in situ hybridization                                                                                                                                                                                                                                                                                                                                                                                                                                                                                                                                                                       | Kawakami et al., 2003                                             | N/A           |
| Nmyc plasmid for in situ hybridization                                                                                                                                                                                                                                                                                                                                                                                                                                                                                                                                                                        | Akiyama et al., 2015                                              | N/A           |
| Prrx1 plasmid for in situ hybridization: pCR-II-Prx1 (M1-2)                                                                                                                                                                                                                                                                                                                                                                                                                                                                                                                                                   | This paper.<br>Sequence below was cloned into pCR-II (Invitrogen) | N/A           |
| GCCGGGGACA TGGTGGCGGC ACAAGCAGAC GAAAGTGTGG GCGAGGCGGG CCGGAGCCTG CTGGAGTCAC<br>CGGGACTGAC CAGTGGCAGC GACACCCCTC AGCAGGACAA TGACCAGTTG AACTCTGAGG AGAAGAAGAA<br>GAGAAAGCAG CGGAGAAACA GGACAACATT CAACAGCAGC CAACTGCAGG CCTTGGAGCG TGTCTTTGAG<br>CGGACACATT ACCCGGATGC TTTTGTTCGA GAAGATCTCG CACGTCCGGT GAACCTCACT GAGGCCAGAG<br>TGCAGGTGTG GTTTCAGAAC CGAAGAGCCA AGTTCGCAG GAATGAGCGA GCCATGCTGG CCAATAAAAA<br>CGCTTCTCTC CTCAAGTCCT ACTCAGGAGA CGTGACTGCT GTGGAGCAAC CCATCGTACC TCGTCTGCT<br>CCCAGACCAA CCGATTATCT CTCTGGGGG ACAGCCTCTC CGTACAGCGC CATGGCTACT TATTCTGCCA<br>CATGTGCCAA CAATAGCCCT GCACAGGGTA |                                                                   |               |
| <b>Software and Algorithms</b>                                                                                                                                                                                                                                                                                                                                                                                                                                                                                                                                                                                |                                                                   |               |
| Statistical analysis                                                                                                                                                                                                                                                                                                                                                                                                                                                                                                                                                                                          | GraphPad                                                          | Prism 7       |
| <b>Other (qRT-PCR reagents)</b>                                                                                                                                                                                                                                                                                                                                                                                                                                                                                                                                                                               |                                                                   |               |
| Absolute Blue qPCR Rox Mix                                                                                                                                                                                                                                                                                                                                                                                                                                                                                                                                                                                    | Thermo                                                            | AB-4138       |
| Etv2                                                                                                                                                                                                                                                                                                                                                                                                                                                                                                                                                                                                          | ABI                                                               | Mm00468389_m1 |

|       |     |               |
|-------|-----|---------------|
| Shh   | ABI | Mm00436528_m1 |
| GAPDH | ABI | 4351309       |

### Supplementary Table 3. Oligonucleotides

| Oligonucleotides               | Sequence                    | ID  |
|--------------------------------|-----------------------------|-----|
| ChIP Region a, sense           | TTCGTTTGATGACTAAATGAGGTAAT  | 678 |
| ChIP Region a, antisense       | TCTCCTTATAAATTGCAGGTCTAAAAA | 679 |
| ChIP Region b, sense           | ACACATGATCTATAGGATTAAGAG    | 670 |
| ChIP Region b, antisense       | CTATTGTGCTGTCATGTTGCTTGG    | 671 |
| ChIP Region c, sense           | GTCACAGTTTGAGATTGTCCTGGT    | 674 |
| ChIP Region c, antisense       | TGAAAGAATCCAATGAACGCTCATG   | 675 |
| ChIP Region d, sense           | GGCAAATGCGCAAACCTCAGTCTG    | 676 |
| ChIP Region d, antisense       | TCTTGCAGGTGTTGGGAGAATCA     | 677 |
| ChIP GAPDH promoter, sense     | CCCTTTTCTGCCTTCCTACC        | 658 |
| ChIP GAPDH promoter, antisense | TGCTGAAGTGCTCCCTACCT        | 659 |

| Oligonucleotides for EMSA    | Sequence (Mutated nucleotides are indicated in lower case)                                 | ID  |
|------------------------------|--------------------------------------------------------------------------------------------|-----|
| Ets#1, upper strand          | CTGAGGTCACCTCCTCTCTTAATT                                                                   | 814 |
| Ets#1, lower strand          | AATTAAGAGAGGAAGTGACCTCAG                                                                   | 815 |
| Ets#1, upper strand, mutated | CTGAGGTCACCTgaaCTCTTAATT                                                                   | 818 |
| Ets#1, lower strand, mutated | AATTAAGAGttcAAGTGACCTCAG                                                                   | 819 |
| Ets#2, upper strand          | GAAGAGAGTAGGAAGTCCAGCCTG                                                                   | 789 |
| Ets#2, lower strand          | CAGGCTGGACTTCCTACTCTCTTC                                                                   | 790 |
| Ets#2, upper strand, mutated | GAAGAGAGTttcAAGTCCAGCCTG                                                                   | 634 |
| Ets#2, lower strand, mutated | CAGGCTGGACTTgaaACTCTCTTC                                                                   | 635 |
| Ets#3, upper strand          | GAGCGATTCAGGAAGTGCTGCTTA                                                                   | 791 |
| Ets#3, lower strand          | TAAGCAGCACTTCCTGAATCGCTC                                                                   | 792 |
| Ets#3, upper strand, mutated | GAGCGATTcAAGTGCTGCTTA                                                                      | 636 |
| Ets#3, lower strand, mutated | TAAGCAGCACTTgaaGAATCGCTC                                                                   | 637 |
| Ets#4, upper strand          | CTGGGTGAAAGGAAATCACAGGCA                                                                   | 793 |
| Ets#4, lower strand          | TGCCTGTGATTTCTTTCACCCAG                                                                    | 794 |
| Ets#4, upper strand, mutated | CTGGGTGAAttcAAATCACAGGCA                                                                   | 638 |
| Ets#4, lower strand, mutated | TGCCTGTGATTTgaaTTCACCCAG                                                                   | 639 |
| Ets#5, upper strand          | AACCTTGCAAGGAAATTTGACTTG                                                                   | 795 |
| Ets#5, lower strand          | CAAGTCAAATTTCTTGAAGGTT                                                                     | 796 |
| Ets#5, upper strand, mutated | AACCTTGCAAttcAAATTTGACTTG                                                                  | 640 |
| Ets#5, lower strand, mutated | CAAGTCAAATTTgaaTGCAAGGTT                                                                   | 641 |
| Ets#1-HOX-E, upper strand    | ACTTTCATAATAAAAGTAAAATGCACAA<br>AATCTGAGGTCACCTCCTCTCTTAATTA<br>GTTGCACTGACCAGGTGGAGGCGAAG | 650 |



|                                  |                                                                                             |     |
|----------------------------------|---------------------------------------------------------------------------------------------|-----|
| Ets#1-HOX-E, lower strand        | CTTCGCCTCCACCTGGTCAGTGCAACT<br>AATTAAGAGAGGAAGTGACCTCAGATT<br>TTGTGCATTTTACTTTTTATTATGAAAGT | 651 |
| ETVA, upper strand               | GTTTTAATATGTTTCTATCCTGTGT                                                                   | 626 |
| ETVA, lower strand               | ACACAGGATAGAAACATATTTAAAAC                                                                  | 627 |
| ETVB, upper strand               | TATTACAGAAAATGAAGTCATATC                                                                    | 797 |
| ETVB, lower strand               | GATATGACTTCATTTTCTGTAATA                                                                    | 798 |
| ETVA, Belg2 mutant, upper strand | GTTTTAATATGTTTCCATCCTGTGT                                                                   | 803 |
| ETVA, Belg2 mutant, lower strand | ACACAGGATgGAAACATATTTAAAAC                                                                  | 804 |
| ETVB, AC mutant, upper strand    | TATTACAGgAAATGAAGTCATATC                                                                    | 799 |
| ETVB, AC mutant, lower strand    | GATATGACTTCATTTcCTGTAATA                                                                    | 800 |
| ETVB, Aus mutant, upper strand   | TATTACAGAAAAGGAAGTCATATC                                                                    | 801 |
| ETVB, Aus mutant, lower strand   | GATATGACTTCcTTTTCTGTAATA                                                                    | 802 |

| Oligonucleotides for reporter plasmid construction | Sequence                          | ID  |
|----------------------------------------------------|-----------------------------------|-----|
| Region i, sense                                    | CTAGCAAATAGGCTGTCCC               | 420 |
| Region I, antisense                                | GGAGGATCCTGTCATTATGTTAAGTTTTATGC  | 654 |
| Region ii, sense                                   | ATAGGTACCGCAACATCCTGACCAATTATC    | 655 |
| Region ii, antisense                               | TACGGATCCTTCTTGCAGGTGTTGGGAGA     | 787 |
| Region iii, sense                                  | CTGGGTACCAAAGATGTAGTCATGTATTAATCA | 786 |
| Region iii, antisense                              | CTTTATGTTTTTGGCGTCTTCCA           | 333 |
