# Supplementary material for: Etv2 regulates enhancer chromatin status to initiate Shh expression in the limb bud
Source: PubMed Central journal article supplement (PMC9304341; doi:10.1038/s41467-022-31848-6), 2022-07-21
Supplement: 41467_2022_31848_MOESM2_ESM.pdf [file 41467_2022_31848_MOESM2_ESM.pdf]

## Reporting Summary

Nature Portfolio wishes to improve the reproducibility of the work that we publish. This form provides structure for consistency and transparency in reporting. For further information on Nature Portfolio policies, see our [Editorial Policies](#) and the [Editorial Policy Checklist](#).

### Statistics

For all statistical analyses, confirm that the following items are present in the figure legend, table legend, main text, or Methods section.

n/a Confirmed

- The exact sample size ( $n$ ) for each experimental group/condition, given as a discrete number and unit of measurement
- A statement on whether measurements were taken from distinct samples or whether the same sample was measured repeatedly
- The statistical test(s) used AND whether they are one- or two-sided  
*Only common tests should be described solely by name; describe more complex techniques in the Methods section.*
- A description of all covariates tested
- A description of any assumptions or corrections, such as tests of normality and adjustment for multiple comparisons
- A full description of the statistical parameters including central tendency (e.g. means) or other basic estimates (e.g. regression coefficient) AND variation (e.g. standard deviation) or associated estimates of uncertainty (e.g. confidence intervals)
- For null hypothesis testing, the test statistic (e.g.  $F$ ,  $t$ ,  $r$ ) with confidence intervals, effect sizes, degrees of freedom and  $P$  value noted  
*Give  $P$  values as exact values whenever suitable.*
- For Bayesian analysis, information on the choice of priors and Markov chain Monte Carlo settings
- For hierarchical and complex designs, identification of the appropriate level for tests and full reporting of outcomes
- Estimates of effect sizes (e.g. Cohen's  $d$ , Pearson's  $r$ ), indicating how they were calculated

*Our web collection on [statistics for biologists](#) contains articles on many of the points above.*

### Software and code

Policy information about [availability of computer code](#)

Data collection

The analysis was performed by R (v4.1.0) and all the codes for reproducing the results can be found at the github site: [https://github.com/djglab/Etv2\\_limb\\_manuscript](https://github.com/djglab/Etv2_limb_manuscript)  
The raw reads were mapped to mouse genome (mm10) using Bowtie2 (v2.2.4), with the parameters -X2000 and -m1.

Data analysis

The analysis was performed by R (ver4.1.0) . The detailed analysis and other tools were described in the Methods section.

For manuscripts utilizing custom algorithms or software that are central to the research but not yet described in published literature, software must be made available to editors and reviewers. We strongly encourage code deposition in a community repository (e.g. GitHub). See the Nature Portfolio [guidelines for submitting code & software](#) for further information.

### Data

Policy information about [availability of data](#)

All manuscripts must include a [data availability statement](#). This statement should provide the following information, where applicable:

- Accession codes, unique identifiers, or web links for publicly available datasets
- A description of any restrictions on data availability
- For clinical datasets or third party data, please ensure that the statement adheres to our [policy](#)

The ATAC-seq dataset that supports the findings of this study have been deposited in Geo Expression Omnibus (GEO) database with the accession number GSE192865. All data will be available upon request.

## Field-specific reporting

Please select the one below that is the best fit for your research. If you are not sure, read the appropriate sections before making your selection.

Life sciences  Behavioural & social sciences  Ecological, evolutionary & environmental sciences

For a reference copy of the document with all sections, see [nature.com/documents/nr-reporting-summary-flat.pdf](https://www.nature.com/documents/nr-reporting-summary-flat.pdf)

## Life sciences study design

All studies must disclose on these points even when the disclosure is negative.

|                 |                                                                                                                                                                                                                                                                                                             |
|-----------------|-------------------------------------------------------------------------------------------------------------------------------------------------------------------------------------------------------------------------------------------------------------------------------------------------------------|
| Sample size     | For immunohistochemical and histological analyses involving animal samples, it is standard to examine three independent embryos for reproducibility. All of the studies were repeated with minimum of three biological replicates and indicated if more samples were analyzed.                              |
| Data exclusions | No data excluded                                                                                                                                                                                                                                                                                            |
| Replication     | All attempts at replication for standard assays (i.e. FACS, qPCR, immunohistochemistry) were successful. These techniques were routinely performed at least in triplicate. Transfection studies were performed in quadruple and repeated at least three times, which produced essentially the same results. |
| Randomization   | The experimental groups are defined based on the genotypes. Therefore, randomization was not relevant to this study. For all of the experiments at least three embryos from the same genotypes were analyzed.                                                                                               |
| Blinding        | Investigators were blinded whenever possible. Cell counting studies were double blinded: imaging and counting were done by separate investigators with samples labeled solely by sample numbers.                                                                                                            |

## Reporting for specific materials, systems and methods

We require information from authors about some types of materials, experimental systems and methods used in many studies. Here, indicate whether each material, system or method listed is relevant to your study. If you are not sure if a list item applies to your research, read the appropriate section before selecting a response.

### Materials & experimental systems

| n/a                                 | Involved in the study                                           |
|-------------------------------------|-----------------------------------------------------------------|
| <input type="checkbox"/>            | <input checked="" type="checkbox"/> Antibodies                  |
| <input type="checkbox"/>            | <input checked="" type="checkbox"/> Eukaryotic cell lines       |
| <input checked="" type="checkbox"/> | <input type="checkbox"/> Palaeontology and archaeology          |
| <input type="checkbox"/>            | <input checked="" type="checkbox"/> Animals and other organisms |
| <input checked="" type="checkbox"/> | <input type="checkbox"/> Human research participants            |
| <input checked="" type="checkbox"/> | <input type="checkbox"/> Clinical data                          |
| <input checked="" type="checkbox"/> | <input type="checkbox"/> Dual use research of concern           |

### Methods

| n/a                                 | Involved in the study                           |
|-------------------------------------|-------------------------------------------------|
| <input type="checkbox"/>            | <input checked="" type="checkbox"/> ChIP-seq    |
| <input checked="" type="checkbox"/> | <input type="checkbox"/> Flow cytometry         |
| <input checked="" type="checkbox"/> | <input type="checkbox"/> MRI-based neuroimaging |

## Antibodies

Antibodies used

Antibody dilutions and amounts used are provided in Supplementary Table 1 and reproduced below:

Anti Active Caspase-3 clone C92-605 (1:200) BD Biosciences BD Cat#559565, RRID:AB\_397274  
 Anti Desmin (1:250 for immunohistochemistry) Novus Novus Cat# NB120-15200, RRID:AB\_789575  
 Anti E47 (0.2microg/reaction for EMSA) Santa Cruz Cat# sc-763X, RRID:AB\_631405  
 Anti Endomucin (1:400 for immunohistochemistry) Abcam Cat# ab106100, RRID:AB\_10859306  
 Anti Etv2 (0.2microg/reaction for EMSA, 2microg/reaction for ChIP) Sana Cruz Cat# sc-164278, RRID:AB\_2100842  
 Anti GFP (1:400 for immunohistochemistry) Abcam Cat# ab13970, RRID:AB\_300798  
 Anti HA (1:200 for immunohistochemistry) Roche Cat# 11867423001, RRID:AB\_390918  
 Anti Hand2 (0.2microg/reaction for EMSA) Santa Cruz Cat# sc-9411, RRID:AB\_2115993  
 Anti HoxD13 (0.2microg/reaction for EMSA) Santa Cruz sc-46364X  
 Anti Pax3 (1:200 for immunohistochemistry) DSHB Cat# PAX3, RRID:AB\_528426  
 Anti phospho histone H3 (1:200 for immunohistochemistry) Millipore Cat# 05-806, RRID:AB\_310016  
 Anti Prrx1 (1:100 for immunohistochemistry) Abcam Ab211292  
 Anti Smooth Muscle Actin (1:800 for immunohistochemistry) Thermo MS-1B-90  
 Anti-SHH (1:200 for immunohistochemistry) Santa Cruz Cat# sc-9024, RRID:AB\_2239216  
 Control mouse IgG (0.2microg/reaction for EMSA) Jackson Cat# 015-000-003, RRID:AB\_2337188  
 Control goat IgG (0.2microg/reaction for EMSA, 2 g/reaction for ChIP) Jackson Cat# 005-000-003, RRID:AB\_2336985  
 Control Rabbit IgG (0.2microg/reaction for EMSA) Jackson Cat# 011-000-003, RRID:AB\_2337118

Tie2-PE (0.2microg per million cells for FACS) e-bioscience Cat# 12-5987-83, RRID:AB\_466101  
 CD31-PE (0.2microg per million cells for FACS) Becton Dickinson Cat# 553373, RRID:AB\_394819  
 CD45-PE (0.2microg per million cells for FACS) e-bioscience Cat# 12-0451-82, RRID:AB\_465668  
 CD16/CD32 (0.5microg per million cells for FACS) Becton Dickinson Cat# 553141, RRID:AB\_394656

Validation

Please see above. RRID and links to the websites for each antibody are provided.

## Eukaryotic cell lines

Policy information about [cell lines](#)

Cell line source(s)

Mouse: NIH3T3 cells ATCC CRL-1658.

Authentication

NIH3T3 cells were purchased from ATCC and no independent authentication was performed.

Mycoplasma contamination

Cell line was tested for micoplasma contamination by standard laboratory screening. All cell lines tested negative for micoplasma contamination.

Commonly misidentified lines  
(See [ICLAC](#) register)

No commonly misidentified cell lines were used in this study.

## Animals and other organisms

Policy information about [studies involving animals](#); [ARRIVE guidelines](#) recommended for reporting animal research

Laboratory animals

Etv2 knockout Ferdous et al., 2009 N/A  
 Etv2flox/flox Shi et al., 2015 N/A  
 Etv2(ER71)-EYFP Rasmussen et al., 2011 N/A  
 Etv2(ER71)-Cre Rasmussen et al., 2011 N/A  
 Etv2(ER71)-CreERT2 This paper N/A  
 ROSA26-LacZ Freidrich 1 et al., 991 RRID:IMSR\_JAX:003309  
 ROSA26-ZsGreen1 Madisen et al., 2010 RRID:IMSR\_JAX:007906  
 ROSA26-rtTA-ires-EGFP Belteki et al., 2005 RRID:IMSR\_JAX:005670  
 iHA-Etv2 This paper/ Behrens et al. 2014 N/A  
 HoxB6-Cre Lowe et al., 2000 RRID:IMSR\_JAX:017981  
 Shh-EGFP-Cre Harfe et al., 2004 RRID:IMSR\_JAX:005622

All animals (males and females) used for breeding were between 8 weeks and 6 months of age. Embryos were staged and used at indicated embryonic stages. Sex of the embryos were not determined.

Animals were kept at 12 hour dark/light cycle, ambient temperature and humidity.

Wild animals

The study did not involve wild animals

Field-collected samples

The study did not involve samples collected from the field.

Ethics oversight

All of our studies have been reviewed and approved by the Institutional Animal Care and Use Committee at the University of Minnesota.

Note that full information on the approval of the study protocol must also be provided in the manuscript.

## ChIP-seq

### Data deposition

 Confirm that both raw and final processed data have been deposited in a public database such as [GEO](#).

 Confirm that you have deposited or provided access to graph files (e.g. BED files) for the called peaks.

Data access links

*May remain private before publication.*

The GEO accession number of the ATAC-seq data produced in this manuscript is GSE192865.

Files in database submission

The raw fastq files and processed data can be accessed at  
 748\_FL\_GFP\_pos\_S38\_R1\_001.fastq  
 748\_FL\_GFP\_pos\_S38\_R2\_001.fastq  
 748\_HL\_GFP\_pos\_S40\_R1\_001.fastq  
 748\_HL\_GFP\_pos\_S40\_R2\_001.fastq  
 753\_HL\_GFP\_pos\_S49\_R1\_001.fastq  
 753\_HL\_GFP\_pos\_S49\_R2\_001.fastq  
 753\_FL\_GFP\_pos\_S47\_R1\_001.fastq  
 753\_FL\_GFP\_pos\_S47\_R2\_001.fastq  
 758\_FL\_GFP\_pos\_S51\_R1\_001.fastq  
 758\_FL\_GFP\_pos\_S51\_R2\_001.fastq

```

758_HL_GFP_pos_S53_R1_001.fastq
758_HL_GFP_pos_S53_R2_001.fastq
Etv2CKO_posteriorHL_902_S1_R1_001.fastq
Etv2CKO_posteriorHL_902_S1_R2_001.fastq
Etv2CKO_posteriorHL_904_S2_R1_001.fastq
Etv2CKO_posteriorHL_904_S2_R2_001.fastq
ATAC_95_S30_R1_001.fastq
ATAC_95_S30_R2_001.fastq
ATAC_105_anterior_S31_R1_001.fastq
ATAC_105_anterior_S31_R2_001.fastq
ATAC_105_GFP_S32_R1_001.fastq
ATAC_105_GFP_S32_R2_001.fastq
LimbWT_1_12-4-20_S12_R1_001.fastq.gz
LimbWT_1_12-4-20_S12_R2_001.fastq.gz
LimbWT_2_12-4-20_S13_R1_001.fastq.gz
LimbWT_2_12-4-20_S13_R2_001.fastq.gz
Etv2cKO_11-07-20_S8_R1_001.fastq.gz
Etv2cKO_11-07-20_S8_R2_001.fastq.gz
Etv2cKO_10-31-20_S7_R1_001.fastq.gz
Etv2cKO_10-31-20_S7_R2_001.fastq.gz
Etv2cKO_12-1-20_S10_R1_001.fastq.gz
Etv2cKO_12-1-20_S10_R2_001.fastq.gz
Etv2cKO_11-28-20_S9_R1_001.fastq.gz
Etv2cKO_11-28-20_S9_R2_001.fastq.gz
Etv2cKO_12-9-20_S11_R1_001.fastq.gz
Etv2cKO_12-9-20_S11_R2_001.fastq.gz
916-10A_S7_R1_001.fastq.gz
916-10A_S7_R2_001.fastq.gz
916-10P_S14_R1_001.fastq.gz
916-10P_S14_R2_001.fastq.gz
916-1A_S1_R1_001.fastq.gz
916-1A_S1_R2_001.fastq.gz
916-1P_S8_R1_001.fastq.gz
916-1P_S8_R2_001.fastq.gz
916-2A_S2_R1_001.fastq.gz
916-2A_S2_R2_001.fastq.gz
916-2P_S9_R1_001.fastq.gz
916-2P_S9_R2_001.fastq.gz
916-3A_S3_R1_001.fastq.gz
916-3A_S3_R2_001.fastq.gz
916-3P_S10_R1_001.fastq.gz
916-3P_S10_R2_001.fastq.gz
916-4A_S4_R1_001.fastq.gz
916-4A_S4_R2_001.fastq.gz
916-4P_S11_R1_001.fastq.gz
916-4P_S11_R2_001.fastq.gz
916-7A_S5_R1_001.fastq.gz
916-7A_S5_R2_001.fastq.gz
916-7P_S12_R1_001.fastq.gz
916-7P_S12_R2_001.fastq.gz
916-9A_S6_R1_001.fastq.gz
916-9A_S6_R2_001.fastq.gz
916-9P_S13_R1_001.fastq.gz
916-9P_S13_R2_001.fastq.gz

```

Genome browser session  
(e.g. [UCSC](#))

Genome browser session for the ATAC-seq data at the ZRS region  
[https://genome.ucsc.edu/s/ndsouza/ZRS\\_region](https://genome.ucsc.edu/s/ndsouza/ZRS_region)  
[https://genome.ucsc.edu/s/ndsouza/LMBR1\\_promoter](https://genome.ucsc.edu/s/ndsouza/LMBR1_promoter)  
[https://genome.ucsc.edu/s/ndsouza/OCC\\_Lmbr1](https://genome.ucsc.edu/s/ndsouza/OCC_Lmbr1)  
[https://genome.ucsc.edu/s/ndsouza/OCC\\_Lmbr1\\_Promoter](https://genome.ucsc.edu/s/ndsouza/OCC_Lmbr1_Promoter)

## Methodology

Replicates

ATAC-seq data has 2 or more replicates to validate reproducibility

Sequencing depth

```

748_FL_GFP_pos_S38_R1_001.fastq
total reads: 54639054
mapped reads: 47680427
uniquely mapped reads: 30543807

748_FL_GFP_pos_S38_R2_001.fastq
total reads: 54639054
mapped reads: 47680427
uniquely mapped reads: 30543807

```

748\_HL\_GFP\_pos\_S40\_R1\_001.fastq  
total reads: 57213338  
mapped reads: 47888101  
uniquely mapped reads: 33437316

748\_HL\_GFP\_pos\_S40\_R2\_001.fastq  
total reads: 57213338  
mapped reads: 47888101  
uniquely mapped reads: 33437316

753\_HL\_GFP\_pos\_S49\_R1\_001.fastq  
total reads: 74612192  
mapped reads: 67612825  
uniquely mapped reads: 45981900

753\_HL\_GFP\_pos\_S49\_R2\_001.fastq  
total reads: 74612192  
mapped reads: 67612825  
uniquely mapped reads: 45981900

753\_FL\_GFP\_pos\_S47\_R1\_001.fastq  
total reads: 67829176  
mapped reads: 62286361  
uniquely mapped reads: 41762762

753\_FL\_GFP\_pos\_S47\_R2\_001.fastq  
total reads: 67829176  
mapped reads: 62286361  
uniquely mapped reads: 41762762

758\_FL\_GFP\_pos\_S51\_R1\_001.fastq  
total reads: 40722378  
mapped reads: 38810665  
uniquely mapped reads: 26725787

758\_FL\_GFP\_pos\_S51\_R2\_001.fastq  
total reads: 40722378  
mapped reads: 38810665  
uniquely mapped reads: 26725787

758\_HL\_GFP\_pos\_S53\_R1\_001.fastq  
total reads: 46619852  
mapped reads: 43302845  
uniquely mapped reads: 30982345

758\_HL\_GFP\_pos\_S53\_R2\_001.fastq  
total reads: 46619852  
mapped reads: 43302845  
uniquely mapped reads: 30982345

Etv2CKO\_posteriorHL\_902\_S1\_R1\_001.fastq  
total reads: 82189062  
mapped reads: 68858048  
uniquely mapped reads: 52079207

Etv2CKO\_posteriorHL\_902\_S1\_R2\_001.fastq  
total reads: 82189062  
mapped reads: 68858048  
uniquely mapped reads: 52079207

Etv2CKO\_posteriorHL\_904\_S2\_R1\_001.fastq  
total reads: 66808320  
mapped reads: 59731377  
uniquely mapped reads: 46519769

Etv2CKO\_posteriorHL\_904\_S2\_R2\_001.fastq  
total reads: 66808320  
mapped reads: 59731377  
uniquely mapped reads: 46519769

ATAC\_95\_S30\_R1\_001.fastq  
total reads: 171844242  
mapped reads: 156195249  
uniquely mapped reads: 111593942

ATAC\_95\_S30\_R2\_001.fastq

total reads: 171844242  
mapped reads: 156195249  
uniquely mapped reads: 111593942

ATAC\_105\_anterior\_S31\_R1\_001.fastq  
total reads: 185476114  
mapped reads: 170789420  
uniquely mapped reads: 136580928

ATAC\_105\_anterior\_S31\_R2\_001.fastq  
total reads: 185476114  
mapped reads: 170789420  
uniquely mapped reads: 136580928

ATAC\_105\_GFP\_S32\_R1\_001.fastq  
total reads: 167791752  
mapped reads: 151643071  
uniquely mapped reads: 105191364

ATAC\_105\_GFP\_S32\_R2\_001.fastq  
total reads: 167791752  
mapped reads: 151643071  
uniquely mapped reads: 105191364

LimbWT\_1\_12-4-20\_S12\_R1\_001.fastq.gz  
total reads: 137566112  
mapped reads: 127103841  
uniquely mapped reads: 87492446

LimbWT\_1\_12-4-20\_S12\_R2\_001.fastq.gz  
total reads: 137566112  
mapped reads: 127103841  
uniquely mapped reads: 87492446

LimbWT\_2\_12-4-20\_S13\_R1\_001.fastq.gz  
total reads: 136227980  
mapped reads: 125591860  
uniquely mapped reads: 89075384

LimbWT\_2\_12-4-20\_S13\_R2\_001.fastq.gz  
total reads: 136227980  
mapped reads: 125591860  
uniquely mapped reads: 89075384

Etv2cKO\_11-07-20\_S8\_R1\_001.fastq.gz  
total reads: 155141888  
mapped reads: 141855951  
uniquely mapped reads: 108181017

Etv2cKO\_11-07-20\_S8\_R2\_001.fastq.gz  
total reads: 155141888  
mapped reads: 141855951  
uniquely mapped reads: 108181017

Etv2cKO\_10-31-20\_S7\_R1\_001.fastq.gz  
total reads: 206321174  
mapped reads: 181691486  
uniquely mapped reads: 141280465

Etv2cKO\_10-31-20\_S7\_R2\_001.fastq.gz  
total reads: 206321174  
mapped reads: 181691486  
uniquely mapped reads: 141280465

Etv2cKO\_12-1-20\_S10\_R1\_001.fastq.gz  
total reads: 37206578  
mapped reads: 36320633  
uniquely mapped reads: 29810444

Etv2cKO\_12-1-20\_S10\_R2\_001.fastq.gz  
total reads: 37206578  
mapped reads: 36320633  
uniquely mapped reads: 29810444

Etv2cKO\_11-28-20\_S9\_R1\_001.fastq.gz  
total reads: 153097026

mapped reads: 138476727  
uniquely mapped reads: 109352511

Etv2cKO\_11-28-20\_S9\_R2\_001.fastq.gz  
total reads: 153097026  
mapped reads: 138476727  
uniquely mapped reads: 109352511

Etv2cKO\_12-9-20\_S11\_R1\_001.fastq.gz  
total reads: 140915224  
mapped reads: 129941796  
uniquely mapped reads: 103831987

Etv2cKO\_12-9-20\_S11\_R2\_001.fastq.gz  
total reads: 140915224  
mapped reads: 129941796  
uniquely mapped reads: 103831987

916-10A\_S7\_R1\_001.fastq.gz  
total reads: 82356704  
mapped reads: 70347619  
uniquely mapped reads: 45736769

916-10A\_S7\_R2\_001.fastq.gz  
total reads: 82356704  
mapped reads: 70347619  
uniquely mapped reads: 45736769

916-10P\_S14\_R1\_001.fastq.gz  
total reads: 81027162  
mapped reads: 70783860  
uniquely mapped reads: 46654179

916-10P\_S14\_R2\_001.fastq.gz  
total reads: 81027162  
mapped reads: 70783860  
uniquely mapped reads: 46654179

916-1A\_S1\_R1\_001.fastq.gz  
total reads: 70084586  
mapped reads: 63272746  
uniquely mapped reads: 42633404

916-1A\_S1\_R2\_001.fastq.gz  
total reads: 70084586  
mapped reads: 63272746  
uniquely mapped reads: 42633404

916-1P\_S8\_R1\_001.fastq.gz  
total reads: 91793802  
mapped reads: 83217390  
uniquely mapped reads: 55185724

916-1P\_S8\_R2\_001.fastq.gz  
total reads: 91793802  
mapped reads: 83217390  
uniquely mapped reads: 55185724

916-2A\_S2\_R1\_001.fastq.gz  
total reads: 76395272  
mapped reads: 66059935  
uniquely mapped reads: 46279666

916-2A\_S2\_R2\_001.fastq.gz  
total reads: 76395272  
mapped reads: 66059935  
uniquely mapped reads: 46279666

916-2P\_S9\_R1\_001.fastq.gz  
total reads: 78277788  
mapped reads: 69945835  
uniquely mapped reads: 47548853

916-2P\_S9\_R2\_001.fastq.gz  
total reads: 78277788  
mapped reads: 69945835

uniquely mapped reads: 47548853

916-3A\_S3\_R1\_001.fastq.gz  
total reads: 96100986  
mapped reads: 82808168  
uniquely mapped reads: 56725333

916-3A\_S3\_R2\_001.fastq.gz  
total reads: 96100986  
mapped reads: 82808168  
uniquely mapped reads: 56725333

916-3P\_S10\_R1\_001.fastq.gz  
total reads: 88720682  
mapped reads: 78217060  
uniquely mapped reads: 53135757

916-3P\_S10\_R2\_001.fastq.gz  
total reads: 88720682  
mapped reads: 78217060  
uniquely mapped reads: 53135757

916-4A\_S4\_R1\_001.fastq.gz  
total reads: 91673492  
mapped reads: 80554363  
uniquely mapped reads: 54588524

916-4A\_S4\_R2\_001.fastq.gz  
total reads: 91673492  
mapped reads: 80554363  
uniquely mapped reads: 54588524

916-4P\_S11\_R1\_001.fastq.gz  
total reads: 96762116  
mapped reads: 84433319  
uniquely mapped reads: 58192466

916-4P\_S11\_R2\_001.fastq.gz  
total reads: 96762116  
mapped reads: 84433319  
uniquely mapped reads: 58192466

916-7A\_S5\_R1\_001.fastq.gz  
total reads: 71202096  
mapped reads: 62975103  
uniquely mapped reads: 42032710

916-7A\_S5\_R2\_001.fastq.gz  
total reads: 71202096  
mapped reads: 62975103  
uniquely mapped reads: 42032710

916-7P\_S12\_R1\_001.fastq.gz  
total reads: 70622010  
mapped reads: 61374899  
uniquely mapped reads: 40154120

916-7P\_S12\_R2\_001.fastq.gz  
total reads: 70622010  
mapped reads: 61374899  
uniquely mapped reads: 40154120

916-9A\_S6\_R1\_001.fastq.gz  
total reads: 73808616  
mapped reads: 63876864  
uniquely mapped reads: 41982709

916-9A\_S6\_R2\_001.fastq.gz  
total reads: 73808616  
mapped reads: 63876864  
uniquely mapped reads: 41982709

916-9P\_S13\_R1\_001.fastq.gz  
total reads: 76407294  
mapped reads: 67347867  
uniquely mapped reads: 45382700



916-9P\_S13\_R2\_001.fastq.gz  
total reads: 76407294  
mapped reads: 67347867  
uniquely mapped reads: 45382700

**Antibodies**

*Describe the antibodies used for the ChIP-seq experiments; as applicable, provide supplier name, catalog number, clone name, and lot number.*

**Peak calling parameters**

macs2 callpeak -t treatment.bam -c control.bam -f BAM -g mm10 -n base\_name --qvalue 0.05 --shift -100 --extsize 200 --nomodel

**Data quality**

Data quality for ATAC-seq was assessed with QC metrics by using FastQC software.

**Software**

bowtie2[2.4.2], macs2[2.2.7.1], picard[2.23.8], bedGraphToBigWig[v377], R [4.1.0]
